# Supplementary material for: COMTOP: Protein Residue–Residue Contact Prediction through Mixed Integer Linear Optimization
Source: MDPI journal article supplement (doi:10.3390/membranes11070503), 2021-06-30
Supplement: s1 [file s1]

Supplementary Materials

# COMTOP: Protein Residue–Residue Contact Prediction through Mixed Integer Linear Optimization

Md. Selim Reza <sup>1,2,†</sup>, Huiling Zhang <sup>1,2,†</sup>, Md. Tofazzal Hossain <sup>1,2</sup>, Langxi Jin <sup>3</sup>, Shengzhong Feng <sup>2</sup> and Yanjie Wei <sup>1,2,\*</sup>

<sup>1</sup> School of Computer Science and Technology, University of Chinese Academy of Sciences, Beijing 100049, China; selim@siat.ac.cn (M.S.R.); hl.zhang@siat.ac.cn (H.Z.); tofazzal@siat.ac.cn (M.T.H.)

<sup>2</sup> Centre for High Performance Computing, Joint Engineering Research Center for Health Big Data Intelligent Analysis Technology, Shenzhen Institutes of Advanced Technology, Chinese Academy of Sciences, Shenzhen 518055, China; sz.feng@siat.ac.cn (S. F.)

<sup>3</sup> Department of Computer Science and Technology, School of Computer Science and Technology, Harbin University of Science and Technology, 52 Xuefu Road, Nangang District, Harbin 150080, China; 1904010508@stu.hrbust.edu.cn (L. J.)

\* Correspondence: yj.wei@siat.ac.cn

† These authors contribute equally to this work.

**Citation:** Reza, S.; Zhang, H.; Hossain, T.; Jin, L.; Feng, S.; Wei, Y. COMTOP: Protein Residue–Residue Contact Prediction through Mixed Integer Linear Optimization. *2021*, *11*, 503. <https://doi.org/10.3390/membranes11070503>

Academic Editor: Marco Lolicato

Received: 25 April 2021

Accepted: 25 June 2021

Published: 30 June 2021

**Publisher's Note:** MDPI stays neutral with regard to jurisdictional claims in published maps and institutional affiliations.

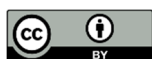

**Copyright:** © 2021 by the authors. Licensee MDPI, Basel, Switzerland. This article is an open access article distributed under the terms and conditions of the Creative Commons Attribution (CC BY) license (<http://creativecommons.org/licenses/by/4.0/>).

**Table S1.** The non-redundant list with 3133 proteins.

|        |        |       |       |       |        |       |       |       |
|--------|--------|-------|-------|-------|--------|-------|-------|-------|
| 7ODCA  | 3BS4A  | 4IN0A | 2R8EF | 5E9NA | 4DYQB  | 5NAKB | 3B4QB | 5Y7FA |
| 4XBAB  | 1PZ4A  | 1I4UB | 3GE3E | 2E5FA | 3OHEB  | 4AVSE | 2ORWA | 4Q4W1 |
| 2VK2A  | 4YWAD  | 4IICA | 4HU2A | 3U7QC | 3N0RA  | 4GA2A | 4ABLA | 4V1SB |
| 4C5CB  | 1YG9A  | 3KZ5E | 5W8QB | 3OGNA | 4LDVA  | 2W6AA | 4FCHB | 4WWFA |
| 5LUND  | 2UZCD  | 2XTPA | 5LF9A | 1TZPB | 2BFDA  | 3CKKA | 5A0DD | 1YD0A |
| 3KYZA  | 3COVA  | 4DK2A | 3QHPB | 4C68C | 2QMLA  | 4U9OA | 5VHGA | 4NYHC |
| 5LU5D  | 5JBXA  | 4RUQB | 1KNGA | 4HE6A | 1OAI A | 5O1LB | 2PKFA | 3PE6A |
| 4G7XA  | 2CARB  | 4XQCA | 4IX3B | 3WURA | 3ULTA  | 4YORA | 1VYIA | 4J5RB |
| 1WVFA  | 3ZVSC  | 2O0AA | 2P51A | 1WPUB | 3LAAA  | 4KT3B | 1DP7P | 3FJUB |
| 3ZSJA  | 3DO8A  | 3NO2A | 3IP8A | 3AJDA | 1NU0A  | 2CCQA | 4U9HL | 4HI7B |
| 2GUV C | 6B9HA  | 5J1JA | 2VB1A | 3R41A | 3HWUA  | 4TKCA | 1WB4B | 4J6OA |
| 3A5FA  | 3QPAA  | 2UU8A | 5AIGB | 2HP0A | 5MJRA  | 3S83A | 4OUSA | 5CVWA |
| 3L1NA  | 5L0VA  | 1XDNA | 6ANZA | 1I2TA | 3E0XB  | 4WY4D | 4L57A | 2X5YA |
| 1OD3A  | 1DG6A  | 4R03A | 4UYRA | 1TP6A | 4I8HA  | 1X54A | 5HTLA | 2CXNB |
| 5FTBA  | 2GKGA  | 3U9RB | 4OQVA | 3AJ7A | 5FBFA  | 2GZSA | 1GV9A | 5VGLA |
| 3M0ZA  | 3DLCA  | 3GZBF | 5IWHA | 5L87A | 1UGIF  | 4G1QB | 5FISA | 4HJIB |
| 4UQZB  | 4H4NA  | 3KKFA | 5CDKA | 4CHIA | 5D4VB  | 3DB7A | 2HX0A | 4TMVA |
| 2GPIA  | 4FN7C  | 2BOGX | 1BX7A | 3CIJB | 1KT6A  | 5KO5A | 2ZADD | 3AYJB |
| 4U5HE  | 4YTW C | 4QOSA | 4DN7A | 4RLZB | 3PVHA  | 3TBNA | 5GQIA | 4B21A |
| 4ZLDA  | 3RO3A  | 4RPMA | 5II8A | 4Z0YB | 2CKKA  | 3IP0A | 5D7UB | 3QNSA |
| 2A35B  | 4B5OA  | 5IXHB | 2XOLB | 3GOHA | 3FYNA  | 3EKIA | 5LXEB | 3MBRX |
| 5B1AK  | 2FRGP  | 4V4MT | 1FCQA | 2PQ8A | 4GWBA  | 5I2HB | 3D32B | 2PYXB |
| 2QE8B  | 4L8PA  | 2ZNRA | 5NRMA | 5HUBA | 2GUIA  | 4LPQA | 3H8GC | 6C4QA |
| 5NZXA  | 3D59A  | 3X0TA | 1R6JA | 3KFFA | 2P5KA  | 3C8CB | 3JQ0A | 2WURA |
| 5I7SA  | 3MR0A  | 2DWUC | 2C3VA | 5IX8A | 3A0YB  | 4P0TB | 1GNLB | 4G4GA |
| 2OLRA  | 1UWKB  | 4RAYA | 5FA8A | 3NSOA | 3LD7A  | 6CR0A | 2Z51A | 1XLQA |
| 2BZ1A  | 5GGNA  | 3S9XA | 4UQXA | 3GKRA | 3B6EA  | 2QR6A | 5N6FA | 4RYOA |
| 4N67A  | 4HDDA  | 2FCWA | 3LHQB | 6B9XB | 1C4QD  | 4ZY9B | 4GZCA | 3M73A |
| 3UB6A  | 1VK1A  | 3URRA | 1TT8A | 2FMAA | 3S44A  | 1GKMA | 4KT3A | 3LAGA |
| 3SMVA  | 3ZUCA  | 5AE0A | 4YTKA | 3KPEA | 2IBDB  | 4BK7A | 5AGIA | 2P0NA |
| 3PHXA  | 4UFQB  | 1M4LA | 4GMUA | 5A8JA | 4XMRB  | 4B1MB | 2DJIA | 5LNDB |
| 4WRIA  | 3RWNB  | 5UUKA | 1RYOA | 5EP6B | 4O0AA  | 4F1VA | 4WWHB | 3CP7B |
| 1MJ5A  | 6CB4A  | 2Y78A | 3PMSA | 2RFRA | 4R6HA  | 3SO6A | 4LUPC | 3GNZP |
| 3ZNVA  | 1T61E  | 5FQEB | 4HFSB | 3VENA | 2NRR A | 2ODIB | 4K12A | 4U98A |
| 3WA2X  | 2O2XA  | 2IUWA | 2FJ8A | 1OK0A | 2ASKB  | 3PIWA | 4RXVA | 4AY0A |
| 2BZVA  | 3F14A  | 4QI3B | 1WWIA | 4M1XD | 4EUOA  | 5C30A | 1MWQB | 2FVVA |
| 5EHIC  | 2RFVA  | 3IB5A | 1ZCEA | 2V4XA | 4UTUB  | 2YN0A | 5NGGA | 5GNFB |
| 3NO7B  | 3D7JB  | 4Z80B | 5J1NA | 2X49A | 5EL9A  | 5NJ9C | 2I5UA | 3DK9A |
| 5VXVA  | 5EWOA  | 5I95A | 1QV1A | 4GT9A | 1W4SA  | 3NKEC | 2GUDB | 5HEEA |
| 5LEOA  | 4BOUA  | 1BKRA | 1SZHB | 2R16A | 5KVS B | 5J3TB | 3A9SA | 1ID0A |
| 4KV7A  | 4CS4A  | 3SZ3A | 3TT9A | 4Z0GA | 5DT6A  | 1MN8C | 2NNUA | 3SGGA |
| 5YJ6A  | 1XQOA  | 1K7CA | 1TUAA | 2YKZA | 3AJ4A  | 4CDPA | 5UDIA | 3T7HB |
| 2I53A  | 5UAMB  | 4ZCEB | 2OVGA | 5WUCA | 3L9AX  | 5BTYA | 4YI8A | 3L8WA |
| 4YUCA  | 4QPNA  | 1ZK5A | 4M0WA | 3RNQA | 5TC6A  | 2JKUA | 5F4CB | 3ISXA |
| 5UEJA  | 4ZJHA  | 3VJ9A | 4P5NB | 5M29B | 4ZILB  | 5O5SA | 4PXYA | 3V5CC |
| 4UE0B  | 2I49A  | 4I4OB | 5XDHC | 5DZEA | 3ZN4A  | 1VMHA | 3T3LA | 1SVFA |
| 2F46B  | 1WERA  | 3R2QA | 4WN5A | 5OL4B | 2ENDA  | 1RTTA | 2NLVA | 1V4PC |
| 1ZHVA  | 5W2IA  | 3R8JB | 3ZBOB | 2HIYA | 3MDQA  | 4JMPA | 2O1QB | 3DKRA |
| 3IE7A  | 5F7FB  | 1VKKA | 4OFAA | 5LPAA | 3ITQB  | 5FVND | 4G9SB | 3ZSUA |
| 4G6TA  | 6BLMA  | 4XDUA | 5B5LA | 2TPSA | 5XP6A  | 2CC6A | 3BQPB | 2R5OA |

|       |       |       |       |       |       |       |       |       |
|-------|-------|-------|-------|-------|-------|-------|-------|-------|
| 5B1AD | 5OVOA | 5A1IA | 5VBDA | 4L9PB | 1NNFA | 3ZY7B | 4ZV5B | 3M66A |
| 3HNYM | 5C9OA | 5TPIA | 3MC3A | 3EQXB | 1WVQB | 2IZRA | 1A62A | 4P7XA |
| 3H75A | 3BEXA | 1W0HA | 4M9VF | 4XXXA | 6FG8A | 3OBLA | 5E4BB | 4WKAA |
| 5FYPB | 4V3IA | 1FSGC | 4YZ0A | 1HZ4A | 1UUYA | 3LLOA | 3QZBA | 1ZZKA |
| 2GJ3B | 5CTMA | 3ZW5B | 2QL8A | 2XZ2A | 4XQ7A | 5KF9A | 4PZ0A | 2FHPA |
| 5IHFB | 2V76C | 4OE9A | 2G7SA | 4I6RA | 3RFEB | 4R6YA | 2WF7A | 5TW9F |
| 3SQZA | 1U8VC | 2VCLA | 3BUXD | 2BT9C | 4DRIB | 4RCJA | 2NQWA | 3NOHA |
| 1FO8A | 3OE3A | 1RV9A | 1O8XA | 1ZL0A | 2CXAA | 3SSXN | 3JUMA | 4WPYA |
| 1IX9B | 1IRQB | 4RD7A | 3MVSA | 3W06A | 5I34B | 3G46A | 3ZZOA | 5U69A |
| 2DKOB | 2COVD | 2WDCA | 1Z6MA | 4AYOA | 3A8GB | 3H7IA | 4CP6A | 3S2RB |
| 4N13A | 5L37C | 3OV9A | 2Z6OA | 5NW3A | 5KDSA | 5O8MD | 3EDHA | 4KQPA |
| 5GJIA | 2INWB | 4GT8A | 5AZBA | 5I5NB | 4BT7A | 4AF8A | 2POFA | 1JY2R |
| 3FSSA | 1LNIB | 5V3NA | 4GC3A | 5UQ6A | 3CECA | 1GCIA | 4B0ZA | 2FSRA |
| 3I94A | 2PHNB | 4MNCA | 3FG9C | 5VEOA | 1KMTB | 4PI8A | 3BLNA | 5J41B |
| 5XA5A | 3F43A | 1EUVA | 2QLTA | 3O8MA | 3U6GB | 5JVIE | 3MYXA | 3OCJA |
| 3EF8A | 2X5XA | 2ZA4D | 4ACJA | 1MC2A | 4EICA | 5UGRA | 3GNLB | 2PC1A |
| 2WLVA | 4LRUA | 1V7WA | 5X9IB | 2W91A | 3MQDA | 2F9HA | 4YECB | 4R75A |
| 4DM5D | 4WZXA | 3IEZA | 4NTDA | 2VOKA | 5E9PA | 5B1AJ | 1NC5A | 5T3BA |
| 3VL1B | 2ZHJA | 3DJEB | 5LBDB | 1G3PA | 4V1GA | 1EZGB | 4HBZA | 5UBAA |
| 5J4OA | 4J42B | 6COJA | 4UQWB | 4U89A | 2O9UX | 6EQEA | 4WHSC | 4QBOA |
| 5DM2A | 5FKTA | 4NKPD | 4EE6A | 2R6JB | 2Q5CA | 4ZQXA | 1T3YA | 3PB6X |
| 5A6WB | 3PPLA | 4BYZA | 4A2VA | 3WKGA | 5MY7A | 5B8DA | 5H0MA | 2BU3A |
| 4KRUA | 2CIBA | 4B9GB | 5UXMA | 4OQ9N | 4PSRB | 2X9ZA | 6B9XC | 2CG7A |
| 5KVRA | 1Q6ZA | 1DK8A | 6CD7A | 5COZA | 5M7DA | 1JG1A | 4J7QA | 3CL6B |
| 4CNNA | 5OLRC | 4G8BA | 1E58A | 3ZRXB | 5MX9A | 3Q6BA | 3LFBK | 5BMNA |
| 2WTPA | 4LRTC | 2GLZB | 1GMUA | 2OLNA | 1MKKB | 5IPYB | 5A6WC | 3O12A |
| 2C92E | 2FHZA | 1XG0D | 1GPPA | 5UX1C | 3O7BA | 5BR4B | 3A57A | 4MCOB |
| 5LY8A | 2IA7A | 3GKJA | 1F9VA | 1BGFA | 1NG6A | 1UI0A | 5BOWA | 3RRIB |
| 5HB7A | 3QVPA | 2NR7A | 1EAQB | 1Q0RA | 4UU3B | 2D68B | 1NYCA | 1LS1A |
| 5LUSF | 1Z0WA | 4O6UA | 4Q4GX | 1L9LA | 1FYEA | 1M2DA | 4M7TA | 2JISB |
| 5WK0A | 5ICUA | 1GY7B | 4XOTA | 5A71A | 2JAEB | 5M33B | 4REIA | 3RQTA |
| 4Y9WA | 5V1YB | 2QEDA | 3VQJA | 3W7TA | 3K6YA | 4P40A | 5DICA | 4N1IA |
| 4F01A | 3IISM | 3VLAA | 3M7AB | 3CT5A | 4PWWA | 1GP0A | 2VFRA | 4I66A |
| 4A3ZA | 4JF8A | 5HTXA | 3KEVA | 3L46A | 5FSVA | 1EUWA | 6B1KA | 5B08A |
| 1M15A | 2O7AA | 4PXEA | 1K5CA | 3TG0D | 5SV5A | 4GNRA | 1KAFC | 4MYDC |
| 4P3HA | 1C1DA | 2P8IB | 4IILA | 2D5MA | 4Q53A | 3BMZB | 5T39A | 3X2MA |
| 1CCWD | 1DJ0A | 4EBGA | 3O2RA | 3JU4A | 3K5JA | 1JKEB | 3SBMA | 3A02A |
| 2HHCA | 1DS1A | 3GO5A | 2OB5A | 1W1HC | 4ZVCA | 6BHDA | 4A29A | 5JAWH |
| 6C3CA | 5KO9A | 1MUWA | 4AW7A | 3GOEA | 1VE4A | 5EDFA | 3X34A | 4HFQB |
| 2QGUA | 2EGVA | 4FR9A | 3BWHA | 5CR4B | 2EHZA | 4A37A | 4YE7A | 5XDCC |
| 4MNOA | 2XN6A | 5OPZA | 4HS2A | 3MCWB | 2CJTD | 5W83A | 2OOAB | 2RKQA |
| 5JJ2A | 3LO8A | 4Z47A | 5JXMA | 4YSIA | 3EUNA | 2VXNA | 1NC7D | 3HDXA |
| 2JHFB | 2NZLA | 1MNNA | 1VYKA | 3U65B | 4LWUA | 2BAYF | 2C61B | 4INWA |
| 4ZOYA | 2I51B | 3LYHB | 3S6EB | 2QNGA | 5NAIA | 2CE2X | 3H4OA | 4BN4A |
| 5JH8A | 4KEFA | 3NJNC | 4TKBA | 3P4HA | 1OCYA | 5AGRA | 3U5SA | 5C5ZB |
| 2GB4B | 4QXLA | 3R4ZA | 5C40B | 1RG8B | 3UJCA | 5B5ZA | 3IVVA | 5G3YA |
| 2HLYA | 2OA2A | 5CKLA | 4V33A | 5EPWA | 5M0NA | 5WS7A | 5GMDA | 2FWHA |
| 4CGSB | 1QNRA | 3S4EA | 2BHUA | 5LQ6A | 3D9NA | 2B9DB | 2QXFA | 3BF7A |
| 5BY5A | 4CD5A | 3FTDA | 4WJQC | 4WJIA | 1WTJB | 5I45A | 4X5PA | 5SV2A |
| 4BPSA | 4G10A | 4M51A | 3DGTA | 5B1AI | 3MVCA | 2RKLC | 1CXQA | 5J3TA |
| 5COFA | 1KQFC | 1U07B | 5BS1A | 1R7JA | 2YDTA | 5DP2A | 1GK9A | 5K4XA |

|       |       |       |       |       |       |       |       |       |
|-------|-------|-------|-------|-------|-------|-------|-------|-------|
| 5K87A | 3NR5A | 4NESA | 5OMTA | 3D3BJ | 4OCVA | 4L9PA | 3GY9A | 2YIMB |
| 5A61A | 5DCUB | 3BT5A | 1ZGKA | 4FUUA | 1TBFA | 1XBIA | 5VGBA | 4MTMA |
| 2HQSA | 5CGQA | 5AOTA | 2XHFB | 5I39A | 1IUQA | 1V05A | 5YQJA | 3W0KB |
| 3ZJAA | 3MILA | 3H4TA | 2W1JB | 3GWIA | 2PYQD | 5KTNA | 5K8JC | 5DU9A |
| 3M0MD | 2WFWA | 4EZGA | 4ONRA | 1J77A | 1OQJA | 3KYJA | 3LDCA | 2XIOA |
| 4OH7A | 4LTTA | 3G5TA | 2QNLA | 4Q4W3 | 4P7OA | 1VD6A | 5VGBB | 5M72A |
| 4FNVA | 3G21A | 1OW4B | 4MUQA | 2W1SA | 4UNUA | 5COWA | 3A8GA | 3UIDA |
| 2BLNB | 5KVGE | 5F2KA | 5JEDA | 3B64A | 3ZHOA | 5FFXC | 3BY8A | 2HUHA |
| 4RD4A | 1SQSB | 4ZBHA | 3WIWA | 5CGQB | 2QNKA | 4D8BA | 3CXNB | 2IAYA |
| 2PRVB | 3MJOB | 3RT2A | 1WCWA | 3KM5A | 4NMWA | 2IMHB | 4J8SA | 2FVYA |
| 5NSAA | 3VIA  | 4W7LB | 3EOJA | 2FI1A | 3I4GA | 3DSKA | 2DSKA | 3CBZA |
| 2FCWB | 3I2KA | 4MIYA | 3MXNA | 1E7LA | 3T7LA | 5YDEA | 4DQJB | 3SUUA |
| 4DVCA | 4I1KB | 5B1AE | 4WSFA | 1H97B | 4A4JA | 5TVOB | 5IDHA | 1U7IA |
| 5MYNA | 2WK1A | 3WI9A | 3PD7A | 2BBRA | 3M6ZB | 4Y1WA | 4PZ3A | 1Z70X |
| 4P3VA | 4EBJB | 5G5CA | 2W3QA | 5HHED | 5JELA | 4AFFA | 4D0UB | 3DQYA |
| 5EJXA | 4IX7B | 1M1FA | 2RE2A | 3NBMA | 4BQNA | 3ONDB | 2Y9UA | 5EWYA |
| 5WD9A | 2F22B | 2A0BA | 4LF0A | 3Q4OA | 4YDRB | 3WX7A | 4J0DA | 4DOIB |
| 4YG0A | 2WZBA | 2OCTB | 3R87A | 5WLFA | 1DD9A | 2CI1A | 5AMBA | 5PMXA |
| 4YYCA | 5MY5A | 3EYEA | 1RWHA | 2IC6A | 4JB3A | 4BU0A | 2QZCA | 1YQSA |
| 4ME2A | 3N2WC | 3IMKA | 2DKJA | 4V1JA | 5IXBA | 1XSZA | 2AIBA | 5NHUJ |
| 1TKEA | 3MSTA | 2J73B | 2F23A | 3OCUA | 4DQ9B | 1J0PA | 5O63B | 5XJ5A |
| 3BONA | 5B7HA | 3MZFA | 1DFMA | 2VLAA | 2G7OA | 6FDGB | 1WMHA | 5MAWE |
| 4CJ0A | 4PH2B | 4C6AA | 3MCXA | 2G3RA | 4L2HA | 5CWHA | 3A35A | 5K91A |
| 2O9SA | 2HMJA | 3Q46A | 4FK9A | 2J43A | 4WZ4A | 4WPGA | 5AOZA | 2OIZA |
| 4ES8B | 1OF8B | 2RBKA | 2J6VB | 4PJ2B | 1I1WA | 4P3AB | 6B2VA | 2AKZA |
| 4ZX2A | 2DPLB | 2XW6C | 4PVKA | 4S39A | 2X5NA | 4XFKA | 3O2TA | 1US0A |
| 3Q4AB | 4EGUA | 2Z26B | 3SK7A | 5MDUA | 4EAEB | 1JO0B | 3GDMA | 5ZHOA |
| 1FP2A | 3VUPB | 2Y24A | 4C08A | 5EL3A | 3BM7A | 3GMXB | 5YALA | 3VSVB |
| 3HR6A | 5LZKB | 4WY4A | 2UV4A | 5O58A | 2Y6XA | 6ES9A | 3SZYA | 5D1MB |
| 5HWAA | 5JBNB | 5E75A | 1N3LA | 5FLWA | 3S5MA | 5JDKA | 2Y0OA | 3A2ZA |
| 5A3AA | 4L2IA | 4E15B | 4QXBB | 5O75A | 4G3OA | 4NYQA | 4LLDB | 2CYJA |
| 3RKGA | 4DT5A | 1W53A | 3DXLA | 2OXGD | 3MJFA | 1R29A | 1RA0A | 1JUHD |
| 4JJAA | 5CD2A | 2OFCB | 5M7YA | 2JLIA | 1LC5A | 1S1DA | 3FRHA | 4DMID |
| 1OYGA | 1VL7A | 1H2CA | 5AEZA | 1C0PA | 5HZDA | 4KH8A | 3U7QB | 1VKEE |
| 2EABA | 1XG0A | 1GWMA | 4AQOA | 2WWEA | 2V25A | 5WPSA | 1W5QB | 5M2OB |
| 2V89B | 4Q2SA | 5M0WA | 1UWCB | 3FXAD | 3CCDB | 1ISUA | 2X4LA | 1T8KA |
| 5N41A | 3ZZPA | 4HMSB | 4HSTB | 4WQKA | 5A1QB | 3NVWB | 1S3CA | 3SjMB |
| 3QZXA | 4PIOA | 1TQGA | 3ZDBA | 3LM3A | 4QHWA | 5XK6B | 4YAAA | 3IUOB |
| 5O0SA | 2YH6C | 4PSFB | 3GIWA | 5LP9A | 4EQPA | 2V8FA | 2V33B | 4DZIA |
| 4GXWA | 3NYCA | 3R9FB | 4Y9VA | 5MPWC | 4NDSB | 3NVSA | 3WJTA | 1ODMA |
| 4NPDA | 4HTUB | 1VQSB | 5H3VA | 4IFAA | 2RILA | 4CICB | 3ZN6A | 2IMFA |
| 1ELKB | 5H7EA | 3SU6A | 2PNEA | 1T9IB | 2FCJA | 4IYAA | 3BVXA | 4H7WA |
| 5LJMA | 2J5YA | 1W7CA | 3RPZA | 2JEKA | 5V2OF | 4W7WA | 4U7AA | 2QSWA |
| 4PLZA | 3LHCA | 4BFOA | 3C70A | 2IMQX | 2GOMA | 1Z3EB | 4E29A | 4X2RA |
| 4Q2LA | 1RYLB | 3DHAA | 4M9KA | 1HXIA | 3ZBDB | 3BGUA | 2FUPA | 3E8TA |
| 1N13E | 3H6JA | 3KU3B | 3GE3A | 3W42A | 3HLZA | 3S8SA | 4K7BA | 3CJSB |
| 4V1KA | 4KL0A | 5X5MA | 4R78A | 3SNOA | 4U8FB | 3HS3B | 4PJ2D | 3VGIA |
| 3Q1XA | 3H0NA | 4CJ0B | 2QB7B | 2EHPB | 3F9XD | 3UFFB | 5TIFA | 2EW0A |
| 2Q3TA | 2ZCMA | 2H8EA | 1FM0E | 2V9VA | 5N0OA | 3ZZYA | 4BGBA | 3VWNX |
| 4D7CB | 3N6ZA | 4X1ZB | 3V68A | 6EIOA | 3PFBA | 4ZZ1A | 4YPOB | 3HP7A |
| 1LUCA | 6B9XA | 1JF4A | 4R5RB | 3PN3B | 1F86A | 5NCJB | 3FILA | 2OKTA |

|       |       |       |       |       |       |       |       |       |
|-------|-------|-------|-------|-------|-------|-------|-------|-------|
| 4O1RA | 5AIMA | 5D8VA | 5TJZA | 4Y88A | 1VHNA | 4Y0GA | 2YH5A | 4IAUA |
| 4ZOTA | 3VZ9B | 4I84B | 5K8JA | 4A56A | 2OV0A | 2P2SB | 3H7CX | 1ZI8A |
| 1WN2A | 3CUZA | 4ZBGA | 3NFTA | 5ZBYA | 1QG8A | 1LZLA | 1XMKA | 4UA6A |
| 3ZR8X | 3H87C | 2XJ4A | 3PFGA | 4H6QC | 1F1EA | 5L9ZB | 5W8OB | 4B6GA |
| 4U0OB | 5MFOD | 3MMHB | 4W8PA | 1O7JC | 5BY8B | 5LS4A | 4MF5A | 3SC7X |
| 4EYZB | 1C7KA | 2JE6A | 3P02A | 2F62A | 2XEPB | 1S9RA | 4G0XA | 5TZMA |
| 1K5NA | 2FCTB | 5B1AP | 5DMAA | 2ERFA | 2GUHB | 3ZXC  | 4HLYA | 4Z9HA |
| 5Y2SA | 6EOZA | 3LB2B | 5DUTA | 1VJUB | 4YFUA | 2W1RA | 1G6XA | 2ZUXB |
| 1H99A | 4XPXA | 4HWMA | 4XXFA | 2CZSB | 4PQDA | 4QXBC | 1NUYA | 3L81A |
| 3GOCB | 1IFRA | 4YZZA | 2W5QA | 1LMIA | 2I3DB | 2OFKB | 1KQFA | 2IUMC |
| 4MYKA | 4I71A | 3WS7A | 5K8SA | 2QSBA | 3ME7A | 2IXMA | 4LX2A | 4UDXX |
| 5JI7A | 3WGX  | 4F2LA | 5V44A | 1D5TA | 5TRQA | 1GMXA | 3WMVB | 5JUHA |
| 5J0KB | 5JS4B | 5UOUA | 5BMTA | 3WCQA | 1EGWC | 3B9TB | 2W7AB | 3LYDB |
| 5UE1B | 5CL8A | 3B9WA | 4ZHWA | 1NXMA | 1W5RB | 5VCMA | 2X5OA | 1HQ1A |
| 3POWA | 3S6FA | 1X6IB | 2R9FA | 4Q98A | 3H74A | 1NWZA | 4YNXA | 3D06A |
| 4H4DB | 1T5BB | 2AXWA | 3MXNB | 4W8BA | 4Q4W2 | 4MFIA | 1Z67A | 2IBNB |
| 5F6RB | 1C5EB | 4UE8A | 5LB7B | 5M12A | 3TG2A | 2RDQA | 4XJ5A | 2C2UA |
| 2PQ7A | 5C2UA | 1S9UA | 4WY4C | 3PL8A | 1QV9A | 4PF3A | 4LGJA | 3JSYB |
| 5J1SA | 3MDUA | 5GNGB | 6C2ZA | 5X7LB | 4X2UA | 3D1PA | 4YNHB | 5CEGC |
| 3K05B | 4JZZA | 3ZZSG | 2NSZA | 3POHA | 3D3BA | 4V0KB | 4QTCA | 6EHIB |
| 5X57A | 1RKUB | 5JAZB | 4CA1B | 5D66A | 3OYVA | 5W2FA | 3PIUA | 3IX3A |
| 4NBPA | 3X0IA | 3W0OA | 2A26A | 3UR8B | 5NT7D | 4GMQA | 3F1LB | 4RVQA |
| 4H5IA | 2YV9B | 4E4RA | 2RBDB | 4XEMA | 5KFZA | 4EP4B | 2VWSA | 4QKDA |
| 4BQYA | 1MY7B | 2ANXB | 4GS3A | 4BJ0A | 1H80B | 2E3HA | 3TYS  | 3WQCA |
| 4JM1A | 4WH9A | 3FGHA | 1RP0A | 5V6JC | 3BB0A | 4E6FA | 5CECA | 1YFQA |
| 4W9ZA | 4NI6A | 3JS8A | 2W31A | 2CIUA | 5O37A | 2NMLA | 3RPEA | 5A62A |
| 4JDUA | 4HLSB | 1WPAA | 1F2TB | 1J3WB | 4TSDB | 5X4RA | 3TU8A | 3WQBB |
| 3A16C | 2HW2A | 2IP6A | 3Q2IA | 1QS1A | 5XVEA | 5HHJA | 5L77A | 5DWAB |
| 1OU8B | 5WSFA | 3IPJA | 3UFEA | 5ELBC | 1RTQA | 3BI1A | 4AL0A | 3TM8A |
| 2YMVA | 4X9XA | 3C9UA | 5OF1B | 4K12B | 5E5YC | 4I3GB | 4DJAA | 2QJWD |
| 3MABB | 5HNVA | 5C17A | 4WFOA | 5KLEA | 5VYQA | 3ROFA | 1XD3A | 2VE8F |
| 2APJD | 1F2TA | 2NUHA | 3KC2A | 1W0NA | 2Q2FA | 5OL4C | 2ASBA | 4BVXB |
| 5THXA | 2NVHA | 3KIZA | 2QJLA | 2VQ2A | 4Y9IA | 3IKWA | 4JBDA | 4RRIA |
| 4XZFA | 4JEJA | 1M22A | 1KWFA | 3IQT  | 5LXXB | 3FKEB | 3TJMA | 2WNKA |
| 2WE5B | 2J9WA | 4HC9A | 3ZHIA | 3PLWA | 5VNYA | 1E5KA | 2W3GB | 4EMTB |
| 1HDOA | 3SIGA | 2I5VO | 1KKOB | 4OJXA | 4EDHB | 1WT6D | 3WH1A | 5GV8A |
| 4LD1A | 1K3XA | 2IT2A | 5JO8A | 4RFUC | 5V01A | 2X2SA | 2BDRB | 4CC2A |
| 5A0NA | 1ATGA | 3SZVA | 4XINA | 3BO6A | 3L6BA | 4QM6B | 2CDPA | 4JHTA |
| 4MXTA | 4BVXA | 3VMKA | 3CMBD | 2ZQ0A | 4MVKA | 2XHGA | 6EVGA | 4WY9A |
| 5N8AX | 6FFAA | 2ZPMA | 1XUBA | 1V5VB | 2HEWF | 4UPIA | 1VCCA | 3S8MA |
| 6CD9A | 5W98A | 3K67B | 2PRXB | 4F06A | 3QR7B | 5U3AA | 4JCCA | 4WIQA |
| 3G7RB | 6BJBA | 3Q1CA | 2GZ4C | 2FP1A | 2OQZA | 5DHDA | 5TT5A | 3T4LB |
| 4JGIA | 2OFZA | 4F54A | 3GPIA | 4IC4A | 5M1MA | 5HQHA | 1G61A | 1WZDB |
| 4A9VA | 4TZ1A | 4CVRA | 4E40A | 5MAOA | 2GKEA | 4F87C | 4HI8A | 4PH8A |
| 4LJOA | 3G02B | 4H14A | 2R4IB | 3RPCB | 4YWKA | 5H1NB | 4N02A | 2XQQC |
| 5JGKB | 2W7ZB | 3U3LC | 3JRVA | 3BHWA | 2E7ZA | 2XPWA | 1Z72B | 1N62A |
| 2BWRA | 5OL4A | 2OVJA | 2XBGA | 1VBWA | 4JP6A | 2DDXA | 2DTJA | 5DLED |
| 1O7IA | 3C9AA | 1QLWA | 1YD9D | 3T92A | 4S28A | 5G38A | 2GGCA | 1KYFA |
| 2VZCA | 4R81A | 6EUWA | 3AGNA | 3M9QA | 1K7JA | 3K7PA | 3KWRA | 3C2UC |
| 1JX6A | 5EW0A | 4WPKA | 1NKIA | 4Z3GA | 1N8VB | 5JUGA | 5AQ0A | 1E6UA |
| 2RL8B | 2OMLA | 3IWF  | 1M9ZA | 3B5MC | 4BRCB | 4NN2B | 1R5MA | 2GS5A |

|       |       |       |       |       |       |       |       |        |
|-------|-------|-------|-------|-------|-------|-------|-------|--------|
| 4ZV0A | 3FSOA | 1LQTB | 4HWVB | 3EURA | 4WNDB | 5K1PA | 3L51B | 4CO8A  |
| 4XFJA | 3AMRA | 1USMA | 1H32A | 2HBAB | 4PQQA | 1JM1A | 5O2XA | 5K2XA  |
| 2X46A | 3BUUA | 2A3NA | 2Q6KA | 5O15A | 4KQIA | 1HFET | 3I10A | 5DVIA  |
| 3MEAA | 4Q4W4 | 2VEZA | 1G2RA | 2B0AA | 1Y8AA | 1FCYA | 4XD1A | 5XN3A  |
| 6AMGB | 3EJFA | 5A0YA | 1YPYA | 2CIOB | 3ZYPA | 5DGJA | 4E6UA | 1SH8A  |
| 2ODKB | 5TDAA | 3UXJB | 4WBJB | 4RUWA | 2FULB | 4KU0B | 1Y5HA | 5CPHB  |
| 4XUWB | 4ZMKA | 2QUDB | 1OI0D | 3M3PA | 3CKCA | 3S2JA | 2O90A | 2YC3A  |
| 2QRLA | 5CEGB | 2ILKA | 5H28A | 4DI9A | 1GUTE | 4NSVA | 2HEUB | 3PLNA  |
| 4YECA | 4X84B | 2WH6A | 1C1KA | 5VPUA | 4RJZA | 1LC0A | 2DEJA | 3V0DB  |
| 4XFMA | 2WNPf | 5ML3B | 4YCBb | 5U81A | 2H30A | 1RXIA | 5W0GA | 3WWCA  |
| 5TKWA | 1NZJA | 5OE3C | 5C5GA | 2V8TB | 1X91A | 3H3LB | 4YX1A | 5LT5B  |
| 4PDYA | 4PSSA | 5MGWA | 1IQZA | 1JNRA | 3FN5A | 1QWGA | 5B1AN | 5AZXB  |
| 3HYNA | 2JG0A | 2XODA | 4TTWA | 3G36C | 4YQDA | 4ZGFA | 2ZWSA | 5J1SB  |
| 4F0WA | 3D9XB | 2Q9KA | 3PESB | 3HPCX | 2ABSA | 1F8EA | 1IOMA | 5HL3A  |
| 2RHWA | 2Y8YA | 1WDDE | 5EZUB | 2JE6I | 2CZLA | 4M91A | 4EA9A | 2R31A  |
| 4KU0D | 3BOEA | 5XEVA | 1HZTA | 2P4FA | 5UWZA | 5HJ9A | 1P5ZB | 4E3YB  |
| 3CTZA | 5LW3A | 3N10A | 4NF1G | 2P6WA | 3DS4B | 3POJB | 5A95B | 3N01A  |
| 4OD6A | 1I27A | 3RX9A | 4KX4A | 4NZKA | 4OA3A | 5T1IB | 3MQZA | 4XEZA  |
| 3D4EA | 1LQVA | 2YVTA | 2VLQA | 2O0MA | 2WDSA | 5DMDB | 1YS1X | 4E2XA  |
| 1X9IB | 4R9PA | 2BFDB | 4I6YA | 3KE7B | 3TUTA | 5K3XA | 2V8IA | 5X9LA  |
| 3TG7A | 5JRYA | 1UNQA | 4XDXA | 4W78C | 6FNUA | 3D0JA | 6AVXA | 3LSNA  |
| 4C84B | 3EERA | 1J98A | 4D0QA | 1JB3A | 4RJWA | 4MBYF | 4PNOA | 4X9RA  |
| 4EVUB | 3BWZA | 3KUVB | 1Z3XA | 3PUCA | 1WPNB | 5VX1B | 3A6RB | 4CBUG  |
| 5FPZA | 2ZPTX | 3MJEA | 4H6CI | 5FAFA | 4ZAVA | 5TSQA | 4UHTB | 4RP3A  |
| 2IYVA | 2VNGA | 4YMYA | 1INLD | 1J3AA | 4MZJA | 5DJHA | 5BPKC | 1SAUA  |
| 6F8PA | 1PMHX | 1DCSA | 4EQBB | 5NZGA | 3QP4A | 3D40A | 4DWRA | 1EVLd  |
| 5EMIA | 5LJXA | 3I33A | 5BJXA | 2NN5A | 1EJ8A | 4JTMA | 2Q1SA | 5G51A  |
| 1YNPB | 5D2KA | 4UHQA | 4DO4A | 5IDVA | 3GAEA | 2CDCB | 1N13L | 2YLN A |
| 3IV4A | 1JZ8C | 5EMXB | 5OHQA | 4ZR8B | 3B0GA | 4FBJA | 2WQFA | 3SD2A  |
| 5MBXA | 5J93A | 3FGVA | 3F0DF | 3QHBB | 3ELFA | 3TDUD | 1QW2A | 2HX5A  |
| 4GHNA | 1V5IB | 4V0SB | 1GVPA | 4AT0A | 3DXYA | 5NWPB | 1JHJA | 5YGBA  |
| 4X9ZA | 2WOYA | 1NTHA | 5APGB | 1R45A | 5ERQA | 4RDBA | 5EQ7A | 5SY4B  |
| 1RK6A | 3TEWA | 3MAOA | 4EQSB | 3D2QD | 4G54A | 4S1PA | 5KARA | 5TLEA  |
| 4PS6A | 6F0QB | 2CIWA | 6B6UA | 5OL9A | 4DMVA | 5KVBA | 5XBIB | 2PR7B  |
| 6B5KA | 5FMUC | 5BPKA | 4W78H | 3EA6A | 4UOBA | 1VR7B | 5LHMA | 5ECKD  |
| 4BOQA | 3ZOQB | 5IG6A | 4LGYA | 3LFRB | 2UVKA | 5O9MA | 4WCKA | 3BEDA  |
| 3LHNA | 4GWGA | 2P9WA | 5II6A | 4AK2A | 1UZ3B | 2VXTI | 1V6PB | 5IGIA  |
| 2Z0JF | 2CXYA | 3JYOA | 2EAQA | 4RTHA | 1JL1A | 2NWFA | 1KGDA | 4TR6B  |
| 4QEKA | 2OZTA | 4MAIA | 4YGBD | 2XOMA | 3ACHA | 2QFAB | 3CHMA | 3AOWC  |
| 1EKQA | 4JG2A | 3A09A | 3VVVA | 3AKSA | 1Q7LB | 5M0YB | 4U9HS | 3N08B  |
| 2V3GA | 4LHSA | 3T47B | 4YTDA | 1OZ2A | 2B97A | 3OBQA | 3DNJA | 3VORA  |
| 4A7UA | 2YFOA | 2BO9B | 1PSRB | 3TEUA | 3OMYA | 3WVAB | 1X0TA | 4M5EA  |
| 1T1UA | 4CI9A | 4FTFA | 4YSLA | 1GK9B | 3GZRB | 4WE2A | 5FYDB | 4ZH5B  |
| 5MFAA | 2VC8A | 2FR5C | 4L2IB | 2DE3A | 4CD8A | 5F5NA | 3DKMA | 2J5GD  |
| 3B5NC | 3CJMA | 2NWRB | 3HKWC | 4N2KA | 1GWEA | 2DY0A | 4N2PD | 5I90A  |
| 3RY4A | 2FYFB | 1M0KA | 6CBNA | 5XVTA | 3D1KA | 4EFPB | 1XPPA | 5IHWA  |
| 2E4TA | 2F60K | 2ZHPA | 3R6DA | 3HJ4B | 3G0KA | 5MPRA | 1RFYB | 1ZV1B  |
| 3TOSJ | 5DFSA | 5AGDB | 4BJIA | 2BRYA | 4L0NB | 5OD4A | 2PXXA | 3LLUA  |
| 2WOLA | 1Q5YC | 5J80A | 4CV7A | 5XM5B | 1SZ7A | 5IO9B | 3U2UA | 1N08B  |
| 4QY7A | 1PO5A | 1XMTA | 4IPUA | 3PLUA | 7A3HA | 4PE3A | 1RKIA | 3H79A  |
| 4W8HA | 4QPTA | 4M8AA | 3BHQB | 2OPCA | 4Q7OA | 5FS8A | 6ENSA | 3OG2A  |

|       |       |        |        |       |       |       |       |       |
|-------|-------|--------|--------|-------|-------|-------|-------|-------|
| 2YZYA | 3UI4A | 3ORUA  | 2NXVB  | 4GEIA | 3GBWA | 4GVQA | 3WDCA | 2QCPX |
| 4NOHB | 5TQIB | 1MK0A  | 1SBYB  | 4QLPB | 2DLBB | 5IDBA | 2WFIA | 3C8ZB |
| 4IYYA | 1GA6A | 3OAJA  | 2XEVB  | 2P17A | 5NVIA | 6B29A | 1CY5A | 4JGLA |
| 3AIAA | 2OB3A | 4JQFA  | 4LEBA  | 1WHZA | 5KKOF | 3FGYA | 5B1AG | 4ESWA |
| 3OM0A | 2BMOB | 2WZOA  | 1UOYA  | 1U84A | 2VPAA | 4BGCA | 5J4FA | 3OV5A |
| 5UFYA | 4EKFA | 2BL8C  | 4ZC3A  | 5FU5A | 2CS7B | 3KGKA | 6FEAF | 3IE4B |
| 3OMDA | 1W23A | 3B5OA  | 2OLMA  | 4JK8B | 3HM4B | 5AHKA | 2MCMA | 2ZCWA |
| 5KLAA | 2GXQA | 3WH2A  | 2H1VA  | 3RLGA | 4B89A | 3GE3C | 4QLPA | 4HROB |
| 3K1UA | 5AZWA | 6C29B  | 3BC9A  | 2C60A | 4AC1X | 5JCAS | 4OQPA | 5J4LA |
| 4WLHA | 4IUSA | 2RA9A  | 3WZ3A  | 3A9FB | 5F47A | 1X6OA | 4ARUA | 3HZPA |
| 2UYTA | 3CT6B | 5OUOA  | 3JXOB  | 1JNIA | 1A3CA | 5A9TA | 4CUAB | 4BEUA |
| 3ESSA | 5GS7A | 4KM6A  | 4R2XB  | 4D7JA | 4O0CA | 3F7EB | 4FZPA | 2NW8A |
| 3B0XA | 4GJZA | 2OY9B  | 1UKFA  | 5UM2A | 2XRYA | 3NO0A | 4NOGA | 4LVFB |
| 5SUIA | 1V0WA | 1LLFA  | 3FEGA  | 3NBCA | 3JUDA | 5UFNA | 4B4DA | 1JETA |
| 5KXHA | 3C8LB | 2X9GC  | 4XLZB  | 4P5EB | 4NNOA | 3M5QA | 4J7NA | 2RAFB |
| 3EN0A | 4IQBA | 3ER7A  | 3EJVA  | 3H9CA | 2DXUA | 2WQKB | 3QC7A | 4AZ6A |
| 4WEEA | 5HT2A | 5P9VA  | 5C98A  | 1Z2NX | 2BKXA | 4X7GA | 5GTQA | 4PHJB |
| 5GZ3B | 3QZRA | 4D0PA  | 5XBCA  | 4HHRA | 1NNXA | 3FWKA | 1L3KA | 5EQ0A |
| 2PIEA | 5A6MA | 2V3IA  | 3QL9A  | 3VZ9D | 1Z6NA | 5IMAA | 1VP8A | 3WARA |
| 1ROCA | 1K4IA | 4W79A  | 2CWSA  | 5JICA | 4Z7EB | 2V7FA | 2HINB | 5UEBB |
| 1UCSA | 5H0QA | 2R01A  | 4M82A  | 5Y9AA | 2OPLB | 2II2A | 4TKXL | 1H4XB |
| 3Q64A | 4IEJA | 4PDNA  | 2WY4A  | 1KQPB | 5AMHA | 3IQUA | 5Y4ZA | 3M8JA |
| 3A0SA | 5L74A | 5GV0A  | 5EJ8H  | 4PP4A | 3EOIB | 1WS8B | 4I8IA | 3GNEB |
| 4A3PA | 3TOWA | 4B1YB  | 3HF5B  | 2PVBA | 4N03A | 4YTBA | 2R0XA | 1MUNA |
| 1EB6A | 3CZXB | 3E8OB  | 4ZRXA  | 4N30A | 2ZOUA | 1ZVAA | 3TPDA | 5GRQA |
| 5JDAA | 5I0YA | 3SXMB  | 1H16A  | 4GVFB | 2ZFDB | 4HI8B | 5B4ZA | 4BPFA |
| 3KH1B | 2PA7B | 5OBT A | 2Z72A  | 2FBAA | 4J9YB | 3VUBA | 4KDDA | 3G91A |
| 2HQXB | 4EZIA | 2AP3A  | 5B1AU  | 3HO6A | 3IFEA | 5WRIA | 1SENA | 4HVKA |
| 2JKHL | 1PP0D | 2WQ4A  | 5A99A  | 1WNAA | 4MYZB | 5BYKA | 4I0WA | 5A8CA |
| 3TKFA | 4M1UA | 5NOAA  | 5A0YE  | 3IT3A | 1YBKB | 2XVMA | 3W07A | 5B1AS |
| 4FP5G | 3ZOJA | 4W8QA  | 1N62C  | 1V7ZA | 2ZDPB | 3LGBB | 5H6XB | 2XETB |
| 4AXOB | 5M10A | 3GA4A  | 4GEKA  | 5B5IA | 4M5RA | 4OHJA | 4ZBOD | 4Z67A |
| 4XB4A | 3VN0C | 2J8KA  | 1T6UE  | 4IGIA | 5UMRA | 1ZMAA | 3L1WD | 2O8QA |
| 5NVGA | 5UJCA | 5XKXA  | 5NJ9D  | 5SVYA | 3HZ8A | 3JTZA | 3I7MA | 6B9XE |
| 1CC8A | 1KJQA | 3R5TA  | 3SHGB  | 3LW3B | 5EC6A | 5BY8A | 2IMJB | 1VMGA |
| 1UTGA | 2FCOA | 4J1OA  | 4ERYA  | 3OXPA | 5NQOA | 3NUFA | 2XFRA | 5NT7A |
| 1R9LA | 1WLZB | 3PP5A  | 5FJDC  | 5A0RA | 4YEPA | 4TXRA | 3LS9A | 5B1RA |
| 2X3MA | 1IDPC | 5A67A  | 5J6YA  | 1JBEA | 4RZ9A | 1BYIA | 2VOVA | 5CUOB |
| 4IUMA | 2O2KA | 2C71A  | 3E48A  | 3SS7X | 6AO9A | 5MK9A | 2HA8A | 2AMLB |
| 2D3DA | 4RWUA | 2DKOA  | 1M7GB  | 3CLMA | 3QM9A | 4OI3A | 4NL9A | 4R1JA |
| 2P0SB | 3LMZA | 5IUCB  | 4BB9A  | 3GIUB | 4NUTB | 5I5PA | 2EPLX | 2W15A |
| 3GP6A | 5TVOA | 5DKXA  | 2CB8A  | 4JXRA | 1I24A | 5LJPA | 5C12A | 1P6OB |
| 5CVDB | 2QFEA | 3GVEA  | 1KOE A | 4REOA | 4RPTB | 6BCBA | 2BKFA | 4PUXA |
| 1KQ6A | 3U9WA | 2W50A  | 5M97A  | 2Z5WA | 4UYBA | 2V9LA | 4ZV0B | 2R6UA |
| 2RK9B | 5KZZA | 2D1SA  | 5LXZB  | 1M55A | 4WP9A | 6ETLA | 4QGOA | 5C33B |
| 3ON9A | 3SK2B | 1CCWC  | 3MWXA  | 5C6SA | 3V7NA | 3DFGA | 2VFOA | 2FKKA |
| 4YLQT | 5A0YF | 4XTBA  | 4QRNA  | 2GKPA | 4WUIA | 3ND1B | 4TYZB | 3WDNA |
| 1W66A | 3RZNA | 6F0PA  | 1UCDA  | 2IU5B | 5Z42A | 5X5VA | 5YXMA | 3F2ZA |
| 1NNLB | 3LFTB | 2QOLA  | 2Z6RA  | 2EX2A | 2GYQB | 2GQTA | 1WHIA | 2OHWA |
| 4NOAA | 3AWUB | 2RH2A  | 5FOTA  | 1AH7A | 5CYVA | 3GRDB | 3QGUB | 3SCYA |
| 1KNMA | 3WMTB | 5IT3B  | 4QP5B  | 4HY4B | 3FYMA | 5XAVB | 1US5A | 3LTIA |

|       |       |       |       |       |       |       |       |       |
|-------|-------|-------|-------|-------|-------|-------|-------|-------|
| 2VH3A | 4HNOA | 2D5WA | 3ACXA | 1T92A | 4GOFA | 5BOBC | 4DDPA | 1UCRA |
| 5K4BA | 2QIPA | 4TXRC | 1F46B | 3GE3B | 5LS7D | 2IA1A | 4MAXC | 3PF6B |
| 3MU7A | 2W47A | 1LWBA | 1HYOA | 3U25B | 3P0BA | 4KZKA | 5B4BB | 2RHFA |
| 1YT3A | 2CNQA | 2G84A | 3SEEA | 4AE7A | 4HCJA | 2QT1A | 4AU1A | 4RAXA |
| 2R2ZA | 3Q7RB | 2WJ5A | 1GYXA | 2XJPA | 5D5YB | 5UZGB | 3VMNA | 5DBLA |
| 3LT7F | 5M72B | 4F2EA | 3KGYB | 4WY4B | 4LMYB | 1OH0B | 3AJ6B | 3LHIA |
| 3NDHB | 2GRRB | 5NZOB | 2W40D | 1NKDA | 2AGKA | 2NLRA | 4ES1A | 5U0IA |
| 3FDEA | 1KDGA | 3SUJA | 5O29A | 4GB5A | 4MC3A | 1S29A | 5T8CA | 4COGC |
| 1Y6XA | 4FZLB | 2FHZB | 2J6BA | 2VCHA | 4WTPA | 1NZ0C | 1QWOA | 1XDZA |
| 2WWXB | 5HGZA | 2YVEB | 2V1MA | 4H8EA | 5O6TA | 5LS7B | 1VLYA | 3BA3A |
| 3B79A | 4NLMA | 6BO0A | 3LWXA | 3LAXA | 4C5KB | 4OMBA | 1QW9B | 5TOQA |
| 4AFMA | 4ZPCA | 3GHAA | 4CFIA | 2HS1B | 4RY1B | 5J90A | 4MZCA | 5A7VA |
| 4OPCA | 3VRDB | 3MWZA | 2DXAA | 5UQZA | 2FSQA | 4WDCA | 5HDKD | 5TCBA |
| 2FGQX | 4REKA | 4A02A | 5ISVA | 5HB6A | 3F6YA | 2OKFA | 2YHGA | 4H3UB |
| 4ALZA | 2I8TB | 1K4NA | 1IO0A | 3GMGB | 4PNEB | 5JE0A | 1N62E | 5JEEA |
| 4Z7XA | 2XWVA | 2RKVA | 3O4PA | 4G9SA | 4JN7A | 3B0FB | 4TVOA | 3PJPA |
| 6COJB | 1W6SC | 4LUAA | 4DQAA | 5OQ3A | 2CCVA | 3BQXA | 4RU3A | 4LA2B |
| 5LZNA | 2ZS0C | 4HTGA | 2Y5PD | 2BF6A | 4GUCB | 2PFIA | 5C8ZB | 3IUWB |
| 3OFGA | 3E4GA | 4R3NB | 5M17A | 5FEWA | 4EQAC | 3CWRB | 2YNAA | 2W8TA |
| 1Z2UA | 3PFEA | 1I71A | 3SOJA | 2E3NA | 5B7YB | 2IJ2A | 1ZUUA | 5NCGB |
| 3QX1A | 2G8SB | 3TJ8B | 4MJDB | 4WJTA | 4K82A | 4OM8B | 3R72A | 4QA8A |
| 1JOVA | 1W6SD | 4ESMA | 2GJ4A | 2WNFA | 2AYDA | 2IC2B | 4JB7A | 3GXHA |
| 4QHQA | 5IK4A | 1X6ZA | 3CI3A | 1HPGA | 4HS1A | 5L9AA | 2F01B | 3P3CA |
| 3CKMA | 2AACB | 1P1XB | 2Y7EB | 3KWEA | 5JIGA | 2OYOB | 6ELMA | 4TVVA |
| 3FMYA | 4Y2FA | 2PY5A | 4KNKB | 4KBXA | 3NNBA | 4BNDA | 4RGDA | 2P14A |
| 3M1XA | 4MAKB | 4X9TA | 4B8XB | 3N6YA | 4PW0A | 5ANPB | 1VYRA | 3ITFB |
| 1UFYA | 2A6ZA | 3GJYA | 4NDOA | 1QQFA | 1Y43B | 3RPDB | 4CNGB | 3H7HB |
| 3HX8B | 2CVIB | 3RL5A | 5LALB | 3MXZA | 1GQIB | 4IL7A | 5CTVA | 3ULJB |
| 3H5JA | 1SFSA | 3QZMA | 4UZ1A | 3MD7A | 3DFFA | 2QJZB | 2QPXA |       |
| 3U7ZA | 4HCSA | 2P4HX | 2FB6A | 5YO6A | 2WCWB | 2JCBB | 5IN4B |       |
| 1JFBA | 5M1PB | 2FCLA | 1PKHB | 3KB9A | 3OOUA | 5X89A | 2OZHA |       |
| 4CE8C | 1R6XA | 1L9XC | 2DDRB | 3TVTB | 3P0KA | 4DQ6B | 2EV1B |       |
| 2QSKA | 3CJSA | 3V46A | 5Y37A | 5NJOA | 4W6YA | 4F98A | 5CWGA |       |
| 2W39A | 3RQ9B | 1YU0A | 2XU3A | 4A6QA | 5GWNA | 2DS5A | 4ZA9A |       |
| 3W61A | 1NLQB | 2HOXD | 3UP3A | 2XDWA | 5OBTf | 2JFRA | 2OIZD |       |
| 3CIMA | 6GAJC | 4ANNA | 2ET1A | 4I6XA | 3T2CA | 1RYQA | 4QASB |       |
| 2B4HB | 4QC6A | 1AHOA | 5AJGA | 3LYEA | 5E1WA | 3CHJA | 2VY8A |       |
| 4Y7LA | 4ZVFA | 1WDDs | 5MUJA | 1Y9LA | 4G78A | 4ERCA | 4RLCA |       |
| 5EWUA | 4ZW9A | 4G7XB | 4LIXA | 1SX5B | 3FCNA | 1X8QA | 2OZJA |       |
| 1JYKA | 3QU3C | 4YTWd | 4EADA | 3NRFB | 3RM3A | 4KQDB | 3SY1A |       |
| 4X33B | 4ATEA | 5E50A | 1D8WD | 5O45A | 4MTUA | 1JI7C | 4WUTA |       |
| 4RK4A | 4FS7A | 5XDTA | 3O9ZA | 3AWUA | 4D6GA | 1YLXA | 4G4KB |       |
| 2F5TX | 4HBQA | 4X33A | 3EO6B | 1GXUA | 3ALJA | 3HLXD | 3NYTA |       |
| 5FD9A | 5GI7A | 2QF4A | 2CVEA | 5YHRA | 2VK8C | 5WGIA | 1VH5A |       |
| 4YKIB | 5HBPA | 3LKMA | 4DB5A | 4EU9A | 4PHRA | 4W64A | 5MULA |       |

Table S2. The training set of COMTOP.

|       |       |       |       |       |       |       |       |       |
|-------|-------|-------|-------|-------|-------|-------|-------|-------|
| 1A3CA | 1RYOA | 2CZLA | 2QNGA | 3BUUA | 3LHNA | 3VZ9B | 4GXWA | 4QHQA |
| 1A62A | 1RYQA | 2D3DA | 2QRLA | 3BWHA | 3LKMA | 3W07A | 4GZCA | 4QKDA |
| 1BGFA | 1S3CA | 2D5MA | 2QSWA | 3BWZA | 3LLOA | 3W42A | 4H7WA | 4QLPB |
| 1BKRA | 1S9UA | 2DDXA | 2QZCA | 3BY8A | 3LTIA | 3W61A | 4H8EA | 4QXLA |



---

|       |        |       |       |        |       |       |       |       |
|-------|--------|-------|-------|--------|-------|-------|-------|-------|
| 1C1DA | 1S29A  | 2DKOA | 2R0XA | 3CECA  | 3LWXA | 3WCQA | 4HC9A | 4QY7A |
| 1C7KA | 1SAUA  | 2DKOB | 2R2ZA | 3CHJA  | 3LYEA | 3WDCA | 4HCSA | 4R1JA |
| 1CC8A | 1SFSA  | 2DSKA | 2R5OA | 3CHMA  | 3M1XA | 3WDNA | 4HE6A | 4R2XB |
| 1CY5A | 1SZ7A  | 2DTJA | 2R9FA | 3CI3A  | 3M5QA | 3WH1A | 4HI8B | 4R9PA |
| 1DCSA | 1T3YA  | 2DXAA | 2R16A | 3CIMA  | 3M9QA | 3WH2A | 4HLYA | 4RAYA |
| 1DD9A | 1T5BB  | 2DXUA | 2R31A | 3CJSB  | 3M66A | 3WIWA | 4HNOA | 4RCJA |
| 1DG6A | 1T8KA  | 2DY0A | 2RA9A | 3CKKA  | 3MAOA | 3WJTA | 4HS1A | 4REIA |
| 1DJ0A | 1T92A  | 2E3HA | 2RDQA | 3CLMA  | 3MBRX | 3WURA | 4HTGA | 4REOA |
| 1DK8A | 1TBFA  | 2E3NA | 2RE2A | 3COVA  | 3ME7A | 3WZ3A | 4HU2A | 4RLCA |
| 1DS1A | 1TP6A  | 2EGVA | 2RFRA | 3CT5A  | 3MEAA | 3X2MA | 4I0WA | 4RPMA |
| 1E7LA | 1TT8A  | 2ERFA | 2RHFA | 3D0JA  | 3MQZA | 3X34A | 4I6XA | 4RRIA |
| 1E58A | 1TUAA  | 2ET1A | 2RILA | 3D1KA  | 3MU7A | 3ZDBA | 4I66A | 4RU3A |
| 1EB6A | 1U7IA  | 2EW0A | 2RKQA | 3D3BA  | 3MVCA | 3ZHIA | 4I71A | 4RVQA |
| 1EJ8A | 1U84A  | 2F5TX | 2TPSA | 3D3BJ  | 3MWXA | 3ZHOA | 4IAUA | 4RWUA |
| 1EKQA | 1UCDA  | 2F9HA | 2UU8A | 3D4EA  | 3MWZA | 3ZJAA | 4IC4A | 4RZ9A |
| 1EUVA | 1UCSA  | 2F23A | 2V1MA | 3D06A  | 3MXZA | 3ZOJA | 4IGIA | 4S39A |
| 1EUWA | 1UFYA  | 2F60K | 2V3GA | 3D9NA  | 3MYXA | 3ZSJA | 4IILA | 4TKBA |
| 1F9VA | 1UI0A  | 2F62A | 2V4XA | 3DB7A  | 3N2WC | 3ZUCA | 4IYA  | 4TKCA |
| 1F86A | 1UOYA  | 2FCJA | 2V7FA | 3DFFA  | 3N08B | 3ZYPA | 4IN0A | 4TSDB |
| 1FCYA | 1USMA  | 2FCLA | 2V8FA | 3DFGA  | 3N10A | 3ZZSG | 4INWA | 4TTWA |
| 1FM0E | 1UUYA  | 2FCOA | 2V9LA | 3DGT A | 3NBCA | 4A02A | 4IPUA | 4TVOA |
| 1FO8A | 1V05A  | 2FCWB | 2V9VA | 3DKMA  | 3NO0A | 4A2VA | 4IQBA | 4TVVA |
| 1FP2A | 1V5IB  | 2FGQX | 2VB1A | 3DNJA  | 3NUFA | 4A3PA | 4J5RB | 4TXRA |
| 1FYEA | 1V7ZA  | 2FKKA | 2VLQA | 3DO8A  | 3NVWB | 4A4JA | 4J6OA | 4U0OB |
| 1G2RA | 1VBWA  | 2FP1A | 2VNGA | 3DQYA  | 3O2RA | 4A6QA | 4J7NA | 4U9HS |
| 1G6XA | 1VD6A  | 2FUPA | 2VOKA | 3DXLA  | 3O7BA | 4A7UA | 4J7QA | 4U89A |
| 1G61A | 1VE4A  | 2G3RA | 2VPAA | 3E8TA  | 3O12A | 4A29A | 4J8SA | 4UE8A |
| 1GK9A | 1VH5A  | 2G84A | 2VWSA | 3EDHA  | 3OBLA | 4ABLA | 4JBDA | 4UHQA |
| 1GMUA | 1VK1A  | 2GB4B | 2VXNA | 3EERA  | 3OBQA | 4AC1X | 4JF8A | 4UOBA |
| 1GP0A | 1VKKA  | 2GGCA | 2VZCA | 3EF8A  | 3OCUA | 4ACJA | 4JG2A | 4UQWB |
| 1GPPA | 1VL7A  | 2GKEA | 2W1RA | 3EJFA  | 3OE3A | 4AF8A | 4JGIA | 4UYBA |
| 1GV9A | 1VLYA  | 2GQTA | 2W3QA | 3EJVA  | 3OGNA | 4AFFA | 4JHTA | 4V0SB |
| 1GVPA | 1VMHA  | 2GS5A | 2W15A | 3ELFA  | 3ORUA | 4ALZA | 4JJAA | 4V3IA |
| 1GWMA | 1W0HA  | 2GUIA | 2W31A | 3EN0A  | 3OYVA | 4ATEA | 4JP6A | 4V33A |
| 1GXUA | 1W0NA  | 2GZSA | 2W39A | 3ER7A  | 3P02A | 4AU1A | 4JTMA | 4W8HA |
| 1GYXA | 1W4SA  | 2H1VA | 2W47A | 3EYEA  | 3P3CA | 4AY0A | 4K12A | 4W8PA |
| 1H32A | 1W66A  | 2H8EA | 2W50A | 3F2ZA  | 3P4HA | 4B0ZA | 4KEFA | 4W8QA |
| 1H99A | 1WCWA  | 2HHCA | 2WDSA | 3F14A  | 3PD7A | 4B1YB | 4KL0A | 4W64A |
| 1I1WA | 1WERA  | 2HIYA | 2WFIA | 3F43A  | 3PHXA | 4B5OA | 4KQIA | 4WBJB |
| 1I71A | 1WHIA  | 2HUHA | 2WFWA | 3FDEA  | 3PJPA | 4B21A | 4KRUA | 4WIQA |
| 1IFRA | 1WHZA  | 2HW2A | 2WJ5A | 3FGYA  | 3PLUA | 4B89A | 4KT3A | 4WJTA |
| 1IOMA | 1WN2A  | 2HX0A | 2WK1A | 3FN5A  | 3PVHA | 4BFOA | 4KU0D | 4WKAA |
| 1IQZA | 1WPNB  | 2HX5A | 2WNFA | 3FRHA  | 3Q6BA | 4BGBA | 4L2IA | 4WP9A |
| 1ISUA | 1WTJB  | 2I5UA | 2WNKA | 3FSOA  | 3Q46A | 4BGCA | 4L2IB | 4WPKA |
| 1J3AA | 1X0TA  | 2I53A | 2WNPF | 3FSSA  | 3Q64A | 4BJ0A | 4L9PA | 4WQKA |
| 1J77A | 1X6OA  | 2IA1A | 2WQFA | 3FTDA  | 3QL9A | 4BJIA | 4L57A | 4WSFA |
| 1J98A | 1X6ZA  | 2II2A | 2WTPA | 3FWKA  | 3QNSA | 4BK7A | 4LJOA | 4WUIA |
| 1JF4A | 1X8QA  | 2IMFA | 2WY4A | 3FYMA  | 3QP4A | 4BN4A | 4LRUA | 4WWFA |
| 1JHJA | 1X91A  | 2IMQX | 2WZOA | 3G0KA  | 3QPAA | 4BNDA | 4LTTA | 4WZXA |
| 1JL1A | 1XBI A | 2IUWA | 2X2SA | 3G46A  | 3QX1A | 4BOQA | 4M8AA | 4X2RA |
| 1JM1A | 1XD3A  | 2IXMA | 2X5NA | 3G91A  | 3QZBA | 4BOUA | 4M91A | 4X7GA |

---

---

|       |       |        |       |       |       |       |       |       |
|-------|-------|--------|-------|-------|-------|-------|-------|-------|
| 1JOVA | 1XLQA | 2J6VB  | 2X5XA | 3GA4A | 3QZMA | 4BPFA | 4MAIA | 4X9RA |
| 1K3XA | 1XMTA | 2J8KA  | 2X5YA | 3GAEA | 3QZRA | 4BPSA | 4MC3A | 4X9XA |
| 1K4IA | 1XSZA | 2J43A  | 2X9ZA | 3GDMA | 3QZXA | 4BQYA | 4MNCA | 4X33A |
| 1K4NA | 1XUBA | 2JCBB  | 2X49A | 3GE3E | 3R72A | 4BT7A | 4MNOA | 4XDUA |
| 1K5CA | 1Y6XA | 2JE6A  | 2XIOA | 3GHAA | 3R87A | 4BU0A | 4MTMA | 4XDXA |
| 1K7CA | 1Y8AA | 2JE6I  | 2XJPA | 3GKJA | 3RL5A | 4BYZA | 4MTUA | 4XEZA |
| 1KGDA | 1Y43B | 2JEKA  | 2XN6A | 3GKRA | 3RLGA | 4C6AA | 4MUQA | 4XINA |
| 1KNMA | 1YD0A | 2JFRA  | 2XODA | 3GNZP | 3ROFA | 4CBUG | 4MVKA | 4XJ5A |
| 1KOEa | 1YG9A | 2JLIA  | 2XOMA | 3GOEA | 3RPZA | 4CD8A | 4MYKA | 4XMRB |
| 1KQ6A | 1YU0A | 2MCMA  | 2XU3A | 3GP6A | 3RT2A | 4CFIA | 4MZCA | 4XPXA |
| 1KQFC | 1Z2UA | 2NLRA  | 2XW6C | 3GWIA | 3RX9A | 4CHIA | 4N1IA | 4XTBA |
| 1KT6A | 1Z3EB | 2NN5A  | 2XWVA | 3GXHA | 3RZNA | 4CNGB | 4N13A | 4XXFA |
| 1KWFA | 1Z6NA | 2NNUA  | 2Y0OA | 3H0NA | 3S2JA | 4CNNA | 4N67A | 4XXXA |
| 1KYFA | 1Z67A | 2NQWA  | 2Y8YA | 3H4OA | 3S4EA | 4CO8A | 4NI6A | 4XZFA |
| 1LQVA | 1Z70X | 2NR7A  | 2Y78A | 3H5JA | 3S9XA | 4CVRA | 4NNOA | 4Y0GA |
| 1LWBA | 1Z72B | 2NRRRA | 2YH5A | 3H7HB | 3SBMA | 4D0QA | 4NOAA | 4Y1WA |
| 1M1FA | 1ZCEA | 2NSZA  | 2YKZA | 3H7IA | 3SD2A | 4D7JA | 4NZKA | 4Y7LA |
| 1M2DA | 1ZHVA | 2NUHA  | 2YMVA | 3HNYM | 3SIGA | 4D8BA | 4O0AA | 4Y9IA |
| 1M4LA | 1ZL0A | 2NWFA  | 2YN0A | 3HPCX | 3SK7A | 4DB5A | 4O0CA | 4Y9WA |
| 1M7GB | 1ZMAA | 2O0MA  | 2YVTA | 3HWUA | 3SO6A | 4DDPA | 4O1RA | 4Y88A |
| 1M15A | 1ZZKA | 2O2KA  | 2YZYA | 3HZ8A | 3SOJA | 4DK2A | 4OA3A | 4YCB  |
| 1MC2A | 2A0BA | 2O7AA  | 2Z5WA | 3IE4B | 3SY1A | 4DO4A | 4OD6A | 4YDRB |
| 1MK0A | 2A6ZA | 2O8QA  | 2Z6RA | 3IEZA | 3SZ3A | 4DVCA | 4OFAA | 4YECA |
| 1MUWA | 2AGKA | 2O90A  | 2Z51A | 3IP0A | 3SZVA | 4E4RA | 4OH7A | 4YECB |
| 1N62A | 2AP3A | 2OB3A  | 2ZFDB | 3IP8A | 3T3LA | 4EGUA | 4OI3A | 4YEPA |
| 1N62C | 2ASBA | 2OB5A  | 2ZHJA | 3IPJA | 3T7LA | 4EICA | 4OJXA | 4YGBD |
| 1NC5A | 2B0AA | 2OHWA  | 2ZNRA | 3IT3A | 3T92A | 4EQPA | 4OMBA | 4YLQT |
| 1NU0A | 2B97A | 2OKFA  | 2ZOUA | 3IVVA | 3TBNA | 4ES1A | 4OQPA | 4YMYA |
| 1NUYA | 2BBRA | 2OLMA  | 2ZPTX | 3IX3A | 3TG2A | 4ESMA | 4OUSA | 4YQDA |
| 1NXMA | 2BKXA | 2ORWA  | 2ZS0C | 3JQ0A | 3TKFA | 4F01A | 4P3VA | 4YSIA |
| 1O7IA | 2BMOB | 2OV0A  | 3A2ZA | 3JTZA | 3TM8A | 4F1VA | 4P5NB | 4YTKA |
| 1O7JC | 2BOGX | 2OVJA  | 3A35A | 3JUDA | 3TOWA | 4F2EA | 4P7OA | 4YWKA |
| 1OCYA | 2BU3A | 2OXGD  | 3ACXA | 3JUMA | 3TUTA | 4F98A | 4P7XA | 4Z0YB |
| 1OD3A | 2BWRA | 2OZJA  | 3AGNA | 3JYOA | 3TYSa | 4FK9A | 4PDNA | 4Z7EB |
| 1ODMA | 2BZ1A | 2P0NA  | 3AJ4A | 3K5JA | 3U2UA | 4FUUA | 4PF3A | 4Z7XA |
| 1OI0D | 2C2UA | 2P5KA  | 3AJ6B | 3K7PA | 3U7ZA | 4FZPA | 4PHRA | 4Z47A |
| 1OK0A | 2C3VA | 2P6WA  | 3AJDA | 3KB9A | 3U25B | 4G0XA | 4PI8A | 4ZAVA |
| 1OQJA | 2CB8A | 2P9WA  | 3AKSA | 3KFFA | 3U65B | 4G6TA | 4PIOA | 4ZC3A |
| 1P5ZB | 2CC6A | 2P51A  | 3AMRA | 3KGKA | 3UB6A | 4G7XB | 4PLZA | 4ZCEB |
| 1PKHB | 2CCQA | 2PIEA  | 3AWUA | 3KM5A | 3UI4A | 4G9SA | 4PNOA | 4ZGFA |
| 1PZ4A | 2CCVA | 2POFA  | 3AWUB | 3KWRA | 3UIDA | 4G9SB | 4PQDA | 4ZHWA |
| 1QQFA | 2CDPA | 2PQ7A  | 3B64A | 3KYJA | 3ULTA | 4G54A | 4PQQA | 4ZILB |
| 1QW2A | 2CI1A | 2PQ8A  | 3B79A | 3KYZA | 3UP3A | 4G78A | 4PS6A | 4ZJHA |
| 1QWGA | 2CIUA | 2Q5CA  | 3BA3A | 3L46A | 3UR8B | 4GB5A | 4PUXA | 4ZOTA |
| 1R6XA | 2CIWA | 2Q6KA  | 3BEDA | 3L51B | 3URRA | 4GC3A | 4PZ3A | 4ZR8B |
| 1R7JA | 2CKKA | 2QCPX  | 3BEXA | 3L81A | 3V46A | 4GEIA | 4Q2LA | 4ZY9B |
| 1R45A | 2CVEA | 2QF4A  | 3BGUA | 3LAGA | 3VGIA | 4GJZA | 4Q4W2 | 5A0DD |
| 1ROCA | 2CWSA | 2QFEA  | 3BHWA | 3LAXA | 3VJ9A | 4GMQA | 4Q4W3 |       |
| 1RTTA | 2CXAA | 2QIPA  | 3BM7A | 3LD7A | 3VQJA | 4GS3A | 4QA8A |       |
| 1RV9A | 2CXYA | 2QJLA  | 3BS4A | 3LGBB | 3VUBA | 4GT9A | 4QBOA |       |
| 1RXIA | 2CYJA | 2QL8A  | 3BT5A | 3LHCA | 3VVVA | 4GWBA | 4QGOA |       |

---

**Table S3.** 239 non-redundant proteins used for testing.

|       |       |       |       |       |       |       |       |       |
|-------|-------|-------|-------|-------|-------|-------|-------|-------|
| 5A0RA | 5C9OA | 5E50A | 5H3VA | 5JEEA | 5LUND | 5OHQA | 5V1YB |       |
| 5A1IA | 5C12A | 5EHIC | 5H6XB | 5JH8A | 5LZKB | 5OL4B | 5V3NA |       |
| 5A3AA | 5C33B | 5EJXA | 5H7EA | 5JI7A | 5LZNA | 5OL9A | 5V6JC | 5Y2SA |
| 5A6WB | 5C98A | 5EL9A | 5HB6A | 5JICA | 5M0WA | 5OMTA | 5V44A | 5Y9AA |
| 5A67A | 5CD2A | 5EMIA | 5HDKD | 5JIGA | 5M0YB | 5OPZA | 5VGBA | 5YDEA |
| 5AGIA | 5CDKA | 5EQ0A | 5HEEA | 5JJ2A | 5M1PB | 5OVOA | 5VGLA | 5YGBA |
| 5AGRA | 5CEGB | 5EQ7A | 5HHJA | 5JO8A | 5M17A | 5SV2A | 5VHGA | 5YO6A |
| 5AJGA | 5CGQA | 5EWUA | 5HJ9A | 5JVIE | 5MAWE | 5SV5A | 5VX1B | 5YQJA |
| 5AMHA | 5CKLA | 5EWYA | 5HQHA | 5K87A | 5MPWC | 5SY4B | 5VYQA | 5Z42A |
| 5ANPB | 5CL8A | 5F6RB | 5HTLA | 5K91A | 5MUJA | 5T1IB | 5W2FA | 5ZBYA |
| 5APGB | 5CR4B | 5FAFA | 5I0YA | 5KLAA | 5MY5A | 5T5LA | 5W2IA | 6AMGB |
| 5AQ0A | 5CTVA | 5FBFA | 5ICUA | 5KO5A | 5NCCB | 5TC6A | 5W83A | 6AO9A |
| 5AZWA | 5CWHA | 5FISA | 5IDBA | 5KO9A | 5NCJB | 5TCBA | 5W98A | 6B1KA |
| 5AZXB | 5D1MB | 5FJDC | 5IDHA | 5KTNA | 5NJOA | 5TDAA | 5WGIA | 6B2VA |
| 5B1AP | 5D2KA | 5FOTA | 5IG6A | 5KVBA | 5NOAA | 5TJZA | 5WK0A | 6B9HA |
| 5B1AS | 5D4VB | 5FSVA | 5IHWB | 5KXHA | 5NQOA | 5TKWA | 5WLFA | 6B9XB |
| 5B1RA | 5D7UB | 5FU5A | 5IO9B | 5KZZA | 5NRMA | 5TLEA | 5WUCA | 6B9XC |
| 5B4BB | 5D8VA | 5FVND | 5IUCB | 5L0VA | 5NSAA | 5TSQA | 5X5MA | 6BCBA |
| 5B08A | 5DBLA | 5FYPB | 5IWHB | 5L37C | 5NVGA | 5U81A | 5X9IB | 6CD9A |
| 5B8DA | 5DFS  | 5G3YA | 5IXHB | 5L74A | 5NVIA | 5UE1B | 5X9LA | 6COJB |
| 5BPKA | 5DHDA | 5GGNA | 5J3TA | 5LALB | 5NW3A | 5UEBB | 5X57A | 6EIOA |
| 5BPKC | 5DICA | 5GJIA | 5J4FA | 5LBDB | 5O5SA | 5UFYA | 5X89A | 6ENSA |
| 5BY5A | 5DLED | 5GMDA | 5J4LA | 5LEOA | 5O6TA | 5UGRA | 5XBIB | 6EOZA |
| 5BYKA | 5DMAA | 5GNGB | 5J6YA | 5LJPA | 5O8MD | 5UUKA | 5XDTA | 6ETLA |
| 5C5GA | 5DMDB | 5GS7A | 5J80A | 5LP9A | 5O9MA | 5UWZA | 5XJ5A | 6FNUA |
| 5C5ZB | 5DZEA | 5GV0A | 5JBNB | 5LS7D | 5O15A | 5UX1C | 5XK6B |       |
| 5C6SA | 5E4BB | 5H0MA | 5JDAA | 5LU5D | 5O75A | 5V01A | 5XM5B |       |

**Table S4.** 30 CASP13 target domains used for testing.

|            |            |          |            |            |          |
|------------|------------|----------|------------|------------|----------|
| T0950-D1   | T0957s2-D1 | T0951-D1 | T1009-D1   | T1009-D1   | T0960-D1 |
| T0953s1-D1 | T0960-D2   | T0960-D5 | T1011-D1   | T1011-D1   | T0960-D4 |
| T0953s2-D2 | T0963-D2   | T0963-D5 | T0953s2-D1 | T0953s2-D1 | T0963-D1 |
| T0953s2-D3 | T0968s1-D1 | T1003-D1 | T0958-D1   | T0958-D1   | T0963-D4 |
| T0957s1-D1 | T0968s2-D1 | T1016-D1 | T1005-D1   | T1005-D1   | T1011-D2 |

**Table S5.** 25 CASP14 target domains used for testing.

|          |          |            |            |            |
|----------|----------|------------|------------|------------|
| T1027-D1 | T1037-D1 | T1042-D1   | T1047s2-D1 | T1065s1-D1 |
| T1029-D1 | T1038-D2 | T1043-D1   | T1047s2-D3 | T1065s2-D1 |
| T1031-D1 | T1039-D1 | T1046s1-D1 | T1049-D1   | T1074-D1   |
| T1033-D1 | T1040-D1 | T1046s2-D1 | T1053-D1   | T1082-D1   |
| T1035-D1 | T1041-D1 | T1047s1-D1 | T1053-D2   | T1090-D1   |

**Table S6.** 57 non-redundant TM proteins used for testing.

|       |       |       |       |       |       |
|-------|-------|-------|-------|-------|-------|
| 2K9PA | 2NDJA | 5OQKA | 5ZAZA | 6CFWI | 6VK0D |
| 2KSDA | 3NYMA | 5VKVA | 6A69B | 6CFWM | 6WB91 |
| 2KSEA | 4QNDA | 5XEFA | 6B2ZT | 6F0KA | 6WB94 |
| 2KSFA | 5EDLA | 5XTDE | 6CFWA | 6ND1E | 6WB95 |
| 2LOMA | 5KTFA | 5XTDF | 6CFWB | 6S3KA | 6WB96 |
| 2LORA | 5KYHA | 5XTDI | 6CFWC | 6S7TC | 6WW7E |

|       |       |       |       |       |       |
|-------|-------|-------|-------|-------|-------|
| 2M0QA | 5LNKY | 5XTDL | 6CFWD | 6S7TE | 6WW7F |
| 2MFRA | 5LNKZ | 5XTDN | 6CFWE | 6S7TF |       |
| 2MMUA | 5MG3F | 5XTDO | 6CFWF | 6S7TG |       |
| 2N4XA | 5OC0A | 5YQ7C | 6CFWG | 6UKJA |       |

**Table S7.** Parameters  $\llbracket \lambda(m1) \rrbracket_i$  (for the seven method COMTOP) obtain from the overall training process are shown in column 1 to 6 respectively.

| Methods | Weight value      |                   |                   |                  |                    |                    |
|---------|-------------------|-------------------|-------------------|------------------|--------------------|--------------------|
|         | Training-model_5L | Training-model_3L | Training-model_2L | Training-model_L | Training-model_L/2 | Training-model_L/5 |
|         | $\lambda(m1)$     | $\lambda(m1)$     | $\lambda(m1)$     | $\lambda(m1)$    | $\lambda(m1)$      | $\lambda(m1)$      |
| CCMpred | 0.005             | 0.117             | 0.085             | 0.077            | 0.00001            | 0.233              |
| DeepCOV | 0.433             | 0.433             | 0.357             | 0.356            | 0.440              | 0.292              |
| EVfold  | 0.008             | 0.000002          | 0.001             | 0.108            | 0.000006           | 0.005              |
| NNcon   | 0.0003            | 0.004             | 0.082             | 0.021            | 0.000001           | 0.004              |
| plmDCA  | 0.008             | 0.000006          | 0.055             | 0.063            | 0.0005             | 0.008              |
| PconsC4 | 0.528             | 0.445             | 0.408             | 0.364            | 0.546              | 0.446              |
| PSICOV  | 0.016             | 0.000003          | 0.002             | 0.009            | 0.000083           | 0.000083           |
